# Supplementary material for: Clinical Tick-Borne Encephalitis in a Roe Deer (Capreolus capreolus L.)
Source: MDPI journal article supplement (doi:10.3390/v14020300), 2022-01-31
Supplement: s1 [file s1]

**Table S1:** Amino acid mutations observed from the comparison of OM084948 (21RS1767), GQ266392 (AS33) and Neudoerfl in E and NS5 proteins.

| Protein | AA<br>Polyprotein | AA<br>Protein | OM084948<br>(21RS1767) | GQ266392<br>(AS33) | U27495<br>(Neudoerfl) | Domain/Region                                      |
|---------|-------------------|---------------|------------------------|--------------------|-----------------------|----------------------------------------------------|
| E       | 331               | 51            | E                      | D                  | E                     | central domain (I)                                 |
|         | 361               | 81            | T                      | I                  | T                     | dimerization<br>domain (II)                        |
|         | 408               | 128           | I                      | I                  | T                     | central domain (I)                                 |
|         | 447               | 167           | V                      | V                  | I                     | /                                                  |
|         | 761               | 481           | I                      | L                  | L                     | flavi_E_stem                                       |
| NS5     | 2532              | 21            | R                      | K                  | R                     | mRNA cap 0 and<br>cap 1<br>methyltransfe<br>domain |
|         | 2559              | 48            | E                      | K                  | E                     |                                                    |
|         | 2562              | 58            | M                      | M                  | V                     |                                                    |
|         | 2619              | 108           | R                      | R                  | K                     |                                                    |
|         | 2764              | 253           | R                      | R                  | K                     |                                                    |
|         | 2905              | 394           | L                      | L                  | M                     | /                                                  |
|         | 2908              | 397           | K                      | K                  | R                     | /                                                  |
|         | 2945              | 434           | H                      | H                  | R                     | /                                                  |
|         | 3297              | 786           | V                      | V                  | A                     | RdRp catalytic                                     |
|         | 3366              | 855           | K                      | K                  | R                     | /                                                  |
